1 **BREAKTHROUGH REPORT**

2 **Identifying root traits affecting root-substrate adhesion in Arabidopsis using a novel**  
3 **centrifugation technique**

4

5 Bethany M Eldridge<sup>1,\*</sup>, Emily R Larson<sup>1,\*</sup>, Laura Weldon<sup>1,a</sup>, Kevin M Smyth<sup>1</sup>, Annabelle N  
6 Sellin<sup>1</sup>, Isaac V Chenchiah<sup>2</sup>, Tanniemola B Liverpool<sup>2</sup> and Claire S Grierson<sup>1,#</sup>

7

8 <sup>1</sup>School of Biological Sciences, University of Bristol, Bristol Life Sciences Building, 24  
9 Tyndall Avenue, Bristol, BS8 1TQ, UK

10 <sup>2</sup>School of Mathematics, University of Bristol, Fry Building, Woodland Road, Bristol BS8  
11 1UG, UK

12 \* Authors contributed equally to this work.

13 #Corresponding author: [lacsg@bristol.ac.uk](mailto:lacsg@bristol.ac.uk)

14 <sup>a</sup>Current address: Wildfowl and Wetlands Trust (WWT), Slimbridge, Gloucester, GL2 7BT,  
15 UK

16

17 **ORCID:**

18 BME: ORCID: 0000-0002-6598-3701

19 ERL: ORCID: 0000-0002-5498-8152

20 LW: ORCID: 0000-0002-0761-4414

21 KMS: ORCID: 0000-0003-0105-8557

22 IVC: ORCID: 0000-0002-8618-620X

23 TBL: ORCID: 0000-0003-4376-5604

24 CSG: ORCID: 0000-0002-4000-0975

25

26 **Short title:** Centrifuge assay quantifies root adhesion

27

28 **One sentence summary:** Using a novel centrifugation assay to identify root traits and novel  
29 genes that contribute to root-substrate adhesion in Arabidopsis.

30

31 The author responsible for distribution of materials integral to the findings presented in this  
32 article in accordance with the policy described in the Instructions for Authors  
33 ([www.plantcell.org](http://www.plantcell.org)) is: Claire Grierson ([lacsg@bristol.ac.uk](mailto:lacsg@bristol.ac.uk)).

34

35

36

## 37 **ABSTRACT**

38 The physical presence of roots and the compounds they release affect the cohesion between  
39 roots and their environments. However, we do not know the plant traits that are most  
40 important, which limits our ability to develop plant root systems with enhanced cohesion  
41 properties. Most methods that quantify the contributions particular traits make to substrate  
42 cohesion are time-intensive and require specialist equipment and complex substrates. We  
43 present an inexpensive, high-throughput phenotyping assay that can identify root traits and  
44 novel genes important for root-substrate adhesion by measuring the centrifugal force required  
45 to detach *Arabidopsis* seedlings from an agar medium. Using this method, we detected root  
46 hair shapes, vesicle trafficking pathways and root exudate composition that are important for  
47 root-substrate adhesion. We also used the assay to conduct a genetic screen, which identified  
48 an uncharacterised ABC transporter and demonstrates how this assay can be used to identify  
49 novel genes that affect root-substrate interactions.

50

## 51 **INTRODUCTION**

52 Plants secrete compounds that help them adapt to their environment, sense and  
53 interact with other organisms, and improve water and nutrient uptake (Bailey et al., 2002;  
54 Datta et al., 2011; Haling et al., 2013). These compounds, termed exudates, can vary in  
55 composition based on plant species, developmental stage, or environment (Naveed et al.,  
56 2017). Recent studies have shown that some compounds have bioadhesive properties that  
57 stick plants and soils together and aggregate soil particles, modifying the microenvironment  
58 around plant roots (Galloway et al., 2018).

59 Understanding how plant biology and physiology contribute to plant-soil interactions  
60 can be confounded by multiple factors: other organisms living in the soil also secrete organic  
61 metabolites that can contribute to soil cohesion, soil composition might affect plant exudate  
62 composition and vice versa. Also, plant root morphology including root architecture and root  
63 hairs can alter root-soil interactions (Baets et al., 2007; Bailey et al., 2002; Burylo et al.;  
64 Ghestem et al., 2014; Stokes et al., 2009). This complexity has made it difficult to  
65 characterise the relevant plant physiology.

66 Increasing centrifugal force has been used to measure the capacity of different tropical  
67 arboreal ant species to adhere to a smooth Perspex surface when spun at increasing speed in a  
68 centrifuge (Federle et al., 2000). We have developed a high-throughput assay that identifies  
69 and quantifies morphological and cellular contributions to root-substrate cohesion in a less  
70 variable environment than the natural rhizosphere. The assay uses a centrifuge to apply force  
71 to *Arabidopsis thaliana* seedlings grown on the surface of a sterile medium and measures the  
72 force required to detach seedlings from that surface. The adherence of candidate lines to the  
73 gel at increasing centrifugal force is then compared to a wild type control line. Applying a

74 Cox proportional hazards regression (Prentice and Kalbfleisch, 2003) to the results from  
75 centrifuging seedlings allows the adherence of candidate Arabidopsis lines relative to wild-  
76 type plants at increasing centrifugal force to be quantified.

77 Here, we show that our centrifugation method can be used to investigate how root hair  
78 morphology contributes to substrate adhesion and screen for biological components that do  
79 not present a visible phenotype. Using the genetic and molecular tools available in  
80 Arabidopsis and working in a sterile environment allows hypotheses about plant adhesive  
81 factors to be tested. While plant-soil cohesion is a complex and dynamic interaction, our  
82 assay provides a way to probe root cellular functions that might be masked by confounding  
83 variables in a soil-based study system. Results from this assay provide a platform for more  
84 comprehensive studies of plant morphology and physiology that promote root-substrate  
85 cohesion.

86

## 87 **RESULTS**

### 88 **Experimental setup and aims**

89 To measure the adhesion of Arabidopsis seedling roots using a centrifuge, it is  
90 important for roots to grow along the surface without penetrating the gel, and that seedlings  
91 do not touch each other, as both events could affect root-gel adhesion by interfering with  
92 seedling detachment during centrifugation. To prevent these issues from happening, ten seeds  
93 were sown 1 cm apart on a 90 mm Petri plate in two parallel rows. The plates were then  
94 orientated vertically at approximately 80° from horizontal and grown for 5-6 days in a growth  
95 chamber (Figure 1A). Individual plates and seedlings were visually evaluated to ensure that  
96 plants were at the same developmental stage and of similar size. Any seedlings that were  
97 touching each other, had grown into the gel, or not uniform in size were omitted from the  
98 assay. The seedlings were then numbered so that plate positional effects could be included as  
99 a potential covariate in the final analysis (Figure 1Bi). Plates were inverted and placed in  
100 centrifuge hanging baskets that held four plates at a time and subjected to increments of  
101 increasing centrifugal force at 720, 1018, 1247, 1440 and 1611 RPM for one minute each  
102 (Figure 1Bii), which applied centrifugal forces to the seedlings forty times gravity and above.  
103 The proportion of seedlings that detached from the gel surface was recorded between each  
104 centrifugal speed; a detachment event was recorded when a seedling had partially or fully  
105 peeled away from the gel (Figure 1Biii). If the gel shattered during the assay, seedlings that  
106 had not detached from the gel were not recorded. Seedlings that remained adhered to the gel

107 after the maximum centrifugal speed were censored in our analyses because we could not  
108 determine the centrifugal detachment force for those seedlings.

109 To calculate the centrifugal force acting on a seedling, the aerial tissue weight,  
110 angular velocity and the distance between the seedling and the axis of rotation in the  
111 centrifuge was used (Figure 1C and Equation 1). The aerial tissue weight of each seedling  
112 was measured because a plant with heavier aerial tissue experiences more force than a lighter  
113 one subjected to the same centrifugal speed.

114 A Cox proportional hazards (PH) regression model is a type of survival analysis used  
115 across different fields to study the timing of an event, such as the time for an animal to learn a  
116 behaviour, an individual to recover from a disease or die, or an electrical failure to occur  
117 (Allison, 2010; Miller, 1998). Here, the Cox proportional hazards (PH) regression model was  
118 used to statistically test for differences between the detachment of experimental seedlings  
119 relative to the wild-type control (Col-0) at increasing force. We used this regression model  
120 over other types of survival analyses because it is commonly used for testing whether  
121 covariates affect the time until an event occurs and can manage censored data (Devarajan and  
122 Ebrahimi, 2009). Seedling position and individual plate number were incorporated as  
123 covariates to account for any heterogeneity. In addition, because roots are developmentally  
124 plastic and sensitive to environmental heterogeneity (Bliss et al., 2002; Gao et al., 2004;  
125 Šmilauerová, 2001), we assessed the root-gel detachment of at least 70 plants from each line  
126 within a single experiment.

127 For each Cox PH regression model conducted, we evaluated (1) the P-value  
128 calculated from the Wald statistic ( $z$ -score) and (2) the hazard ratio with upper and lower  
129 bound confidence intervals. The hazard ratio is an exponential coefficient (Cox and Oakes,  
130 1984) that was used to compare the risk of seedling detachment between candidate lines  
131 relative to wild type, and was used to measure effect size to assess differences between the  
132 root-gel adhesion of candidate lines and wild type. Wild type was used as the baseline group  
133 for all models, with a hazard ratio of one. A candidate line with higher risk of detachment  
134 from gel than wild type will have a hazard ratio above one. For example, a hazard ratio of 2.6  
135 indicates that the line has 2.6 times the risk of seedling detachment from the gel compared to  
136 wild type. Conversely, lines with a lower risk of detachment than wild type will have a  
137 hazard ratio below one. For example, a hazard ratio of 0.4 indicates that the candidate line  
138 has a lower risk, only 0.4 times the detachment risk of wild type. A candidate line with a  
139 hazard ratio of 1.7 may also be interpreted as having a risk that has **increased by 70%** or is  
140 0.7 times **more** relative to the hazard ratio of the wild-type control (Sedgwick, 2014).



141 While the centrifuge assay was initially optimized as one component of a report on  
142 how the absence or presence of root hairs affects root-substrate adhesion (De Baets et al.,  
143 2020), we wanted to test the capability of the assay to evaluate other traits and provide a  
144 highly quantifiable and affordable way to screen large populations of seedlings for the  
145 identification of new genetic factors important for plant-substrate interactions. To assess this,  
146 we used the assay to characterise: (1) mutants with different root hair morphologies to see if  
147 we could detect effects of root hair shape on adhesion; (2) mutants with altered vesicle  
148 trafficking but no known root hair morphological defects to identify trafficking functions that  
149 affect adhesion; (3) mutants with altered exudate composition but no known root hair  
150 morphological defects to detect effects of exudate composition; and (4) lines from a mutant  
151 population in a forward genetic screen to identify novel genes that affect root-substrate  
152 adhesion.

153

#### 154 **Root hair morphological effects on root-substrate adhesion**

155 We screened mutant lines with known root hair morphology defects to ask if the  
156 centrifuge assay could determine if root hair shape affects root-substrate adhesion. The  
157 mostly bald mutant *cslD3*, which encodes the CESA-like 3D protein (Favery et al., 2001;  
158 Yang et al., 2020) was included as a root hairless example. For lines that produce short or  
159 malformed root hairs, we included the *gdi1-2* Rho GTPase GDP dissociation inhibitor  
160 mutant, *roll-2* rhamnase biosynthesis 1 mutant allele, *can of worms 1* (*cow1-3*)  
161 phosphatidylinositol transferase protein mutant, and *lrx1-4* leucine rich extensin 1 mutant  
162 (Baumberger et al., 2001; Böhme et al., 2004; Carol et al., 2005; Diet et al., 2006; Grierson et  
163 al., 1997). The *roll-2* and *gdi1-2* mutants have short root hairs and the root hairs on *gdi1-2*  
164 plants can also branch (Parker et al., 2000; Ringli et al., 2008). *cow1-3* plants have short,  
165 wide root hairs that can branch, whilst *lrx1-4* plants can develop root hairs that abort, swell,  
166 branch, or collapse in a growth condition-dependent manner (Baumberger et al., 2001;  
167 Grierson et al., 1997; Parker et al., 2000). Under our growth conditions, we confirmed the  
168 reported phenotypes for each mutant line (Figure 2A).

169 Consistent with previous results (De Baets et al., 2020), bald (*cslD3*) seedlings  
170 detached at lower centrifugal forces relative to wild-type seedlings, with 4.6 times the risk of  
171 detachment compared to wild-type plants ( $z = 8.644$ ,  $P < 0.001$ , HR = 4.636, 95% CI = 3.274 –  
172 6.564; Figure 2B). Mutants with deformed root hair phenotypes including *gdi1-2*, *roll-2*,  
173 *cow1-3* and *lrx1-4* had risks of detachment that were 2.5, 4, 3.8 and 3.9 times that of wild-  
174 type plants, respectively (*gdi1-2* –  $z = 5.199$ ,  $P < 0.001$ , HR = 2.459, 95% CI = 1.752 – 3.452;

175 *roll-2* –  $z = 7.927$ ,  $P < 0.001$ , HR = 4.036, 95% CI = 2.858 – 5.698; *cow1-3* –  $z = 7.350$ ,  
176  $P < 0.001$ , HR = 3.790, 95% CI = 2.657 – 5.407; *lrx1-4* –  $z = 8.049$ ,  $P < 0.001$ , HR = 3.926,  
177 95% CI = 2.814 – 5.478; Figure 2B-D). These results indicate that the centrifuge assay can  
178 quantify effects of root hair shape on root-substrate cohesion. Many of the root hair mutants  
179 tested are associated with changes in root hair cell wall composition, suggesting that  
180 alterations in secreted compounds could affect root-substrate interactions in addition to any  
181 physical or surface area-related factors that are specific to root hairs.

182

### 183 Vesicle trafficking mutations affect root-substrate adhesion

184 We hypothesized that Arabidopsis mutants with defective trafficking pathways  
185 might alter cell wall and apoplast characteristics that contribute to root-substrate interactions  
186 and adhesion. We chose the secretory Soluble NSF (N-ethylmaleimide sensitive fusion  
187 protein) Attachment proteins (SNAP) REceptor (SNARE) mutants *syp121* and *syp122-1*, and  
188 the endocytic mutants, *chc1-2* and *chc2-3* as candidates for our assay. SYP121 is the primary  
189 secretory SNARE found on the plasma membrane (Assaad et al., 2004; Geelen et al., 2002)  
190 and has characterized aboveground phenotypes, including small rosettes and stomatal  
191 mobility defects (Eisenach et al., 2012; Larson et al., 2017); however, the mutant does not  
192 have a reported root hair phenotype. Although the related SNARE SYP122 is thought to  
193 share partial functionality with SYP121, the *syp122-1* mutant does not share these  
194 phenotypes with *syp121* and a recent proteomic analysis reported differences in their vesicle  
195 cargoes, which could contribute to their functional independence (Waghmare et al., 2018).  
196 The *chc1-2* and *chc2-3* mutants are defective in the heavy chain subunits of the clathrin coat  
197 complex, which is required for vesicle traffic at the plasma membrane (Kitakura et al., 2011).  
198 Endo- and exocytic rates are impaired in both mutants (Larson et al., 2017), but no root hair  
199 phenotypes have been reported. For the centrifuge assay, it was important to select mutants  
200 that do not have root hair phenotypes given the effect root hair morphology has on root-gel  
201 adhesion. Therefore, we evaluated the root hairs of these trafficking mutants and found that  
202 the root hairs of these lines did not significantly differ from wild-type plants (Figure 3A).

203 Overall, the risk of detachment for *syp121*, *syp122-1*, *chc1-2* and *chc2-3* plants was  
204 3.6, 3.3, 4.5 and 3.9 times that of wild type, respectively (*syp121* –  $z = 7.702$ ,  $P < 0.001$ , HR =  
205 3.593, 95% CI = 2.595 – 4.975; *syp122-1* –  $z = 7.199$ ,  $P < 0.001$ , HR = 3.270, 95% CI = 2.369  
206 – 4.515; *chc1-2* –  $z = 8.238$ ,  $P < 0.001$ , HR = 4.482, 95% CI = 3.137 – 6.405; *chc2-3* –  $z =$   
207 7.653,  $P < 0.001$ , HR = 3.941, 95% CI = 2.774 – 5.599; Figure 3B, C). Given that all the  
208 mutants detached from the gel at lower centrifugal forces than wild-type seedlings, these

209 results indicate that the corresponding genes contribute to root-substrate adhesion and that the  
210 centrifuge assay can be used to probe for intracellular molecular machinery that affect root-  
211 substrate interactions.

212

### 213 **Exudate composition changes root detachment rates**

214 Over 20% of plant assimilated carbon is released as root exudates (Huang et al., 2016)  
215 that modify the external environment in response to abiotic and biotic stimuli and contribute  
216 to soil adhesion (Akhtar et al., 2018; Galloway et al., 2018). Root epidermal and hair cells  
217 secrete compounds that contribute to root exudate profiles that can be plant species specific  
218 (Naveed et al., 2017). Because mutants in both root hair development and vesicle trafficking  
219 pathways showed root-substrate adhesion phenotypes (Figures 2 and 3), we asked if the  
220 centrifuge assay could identify effects of exudate composition on root-substrate adhesion. We  
221 selected Arabidopsis mutants reported to have altered exudate composition compared to wild  
222 type, including *pft1-3*, *jin1-9*, and *pdr2* (Badri et al., 2009; Berger et al., 1996; Carvalhais et  
223 al., 2015; Kidd et al., 2009). *PFT1* (*MED25*) encodes the MEDIATOR25 subunit of the  
224 Mediator nuclear protein, and *JINI* (*MYC2*) encodes a basic helix-loop-helix Leu zipper  
225 transcription factor; both proteins are involved in the jasmonate signalling pathway (Kidd et  
226 al., 2009; Lorenzo et al., 2004). *pft1-3* and *jin1-9* mutants are reported to have altered root  
227 exudate composition, including lower amounts of the amino acids asparagine, ornithine and  
228 tryptophan than wild-type plants (Carvalhais et al., 2015). *PDR2* (*ABCG30*) encodes a  
229 pleiotropic drug resistance (PDR) full-length ABC transporter that is involved in ABA  
230 transport and the exudation of secondary metabolites (Badri et al., 2008; Kang et al., 2015).  
231 We did not observe root hair growth phenotypes in these mutant lines compared to wild type  
232 (Figure 4A).

233 We found that compared to wild-type seedlings, *pdr2* seedlings resisted detachment,  
234 with 0.38 times the risk of detaching from the gel ( $z = -5.765$ ,  $P < 0.001$ , HR = 0.379, 95% CI  
235 = 0.273 – 0.528; Figure 4B). Conversely, *pft1-3* seedlings had an increased risk of  
236 detachment 1.7 times that of wild-type plants ( $z = 3.315$ ,  $P < 0.001$ , HR = 1.698, 95% CI =  
237 1.242 – 2.323), and there was no difference in gel adhesion between *jin1-9* and wild-type  
238 plants ( $z = 0.737$ ,  $P > 0.05$ , HR = 1.124, 95% CI = 0.824 – 1.537; Figure 4B). These results  
239 show that exudate composition can alter root-substrate interactions, although this may not be  
240 the case for all exudate compositional changes, or identification of the effects of the exudate  
241 composition of the *jin1-9* mutant lay outside the sensitivity range of the assay. Since these  
242 mutant lines did not have root hair phenotypes, our results suggest that changes in exudate

243 composition alter root adhesive properties without affecting plant root hair morphology,  
244 further indicating the power of the centrifuge assay as a potential mutant screening method.

245

### 246 **Centrifuge assay as a method for forward genetic screening**

247 Having demonstrated that our centrifugation technique can be used to identify  
248 different types of traits that affect root-substrate adhesion, we conducted a forward genetic  
249 screen to identify novel genes involved in root-substrate adhesion. To conduct this screen, the  
250 root-gel adhesion properties of individual plants from a pooled SALK T-DNA insertion  
251 mutant collection were analysed (Alonso et al., 2003). Individual plants with significantly  
252 increased or decreased root-gel adhesion relative to wild-type plants were recovered from the  
253 screen and self-fertilized to obtain progeny and identify the mutations. We identified a line  
254 with significantly enhanced root-gel adhesion and conducted genomic Next-Generation  
255 sequencing followed by Sanger sequencing of T-DNA flanking PCR products to confirm a T-  
256 DNA insertion in the ABC transporter gene, *ABCG43*, whose function is unknown. We  
257 named this T-DNA insertion line *abcg43-1* and identified additional mutant alleles, *abcg43-2*  
258 (SALK\_201207c) and *abcg43-3* (SALKseq\_30713) (Figure 5A).

259 We analysed the root-gel adhesion of homozygous insertional mutant alleles for  
260 *ABCG43* and found *abcg43-1*, *abcg43-2* and *abcg43-3* plants resisted detachment from the  
261 gel, with detachment risks 0.25, 0.35 and 0.2 times that of wild-type plants, respectively  
262 (*abcg43-1* –  $z = -7.823$ ,  $P < 0.001$ , HR = 0.245, 95% CI = 0.172 – 0.348; *abcg43-2* –  $z = -$   
263  $6.049$ ,  $P < 0.001$ , HR = 0.355, 95% CI = 0.253 – 0.496; *abcg43-3* –  $z = -7.179$ ,  $P < 0.001$ , HR =  
264  $0.203$  –  $0.403$ ; Figure 5B, C). Collectively, these results suggest that disruption of *ABCG43*  
265 expression and protein function affects root-gel adhesion. These results also illustrate the use  
266 of the centrifuge assay as a powerful screening method for identifying novel genes involved  
267 in root-substrate adhesion, as well as a tool for evaluating the effects of known gene function  
268 on root-substrate interactions. Experiments are now being conducted to identify mutant  
269 trait(s) in these lines and understand how *ABCG43* affects root-substrate adhesion.

270

### 271 **DISCUSSION**

272 To date, most published methods that quantify the contribution of particular traits to plant-  
273 soil interactions are time-intensive, require specialist equipment and use complex substrates  
274 (Bailey et al., 2002; De Baets and Poesen, 2010; De Baets et al., 2020; Toukura et al., 2006).  
275 In contrast, our assay can produce data within a week, is available to any laboratory with  
276 access to a bench top centrifuge and does not require speciality consumables. This method is

277 a high-throughput and quantitative way to test the effects of root morphology and cell  
278 function on root-substrate adhesion and to screen for new biological and molecular factors  
279 that can alter plant-substrate interactions. Using a defined model system like Arabidopsis and  
280 sterile medium conditions permits plant-specific characteristics to be identified that can then  
281 be probed in other substrate- or soil-based conditions.

282

### 283 **Using the centrifuge assay to investigate the role of root hairs in root-substrate** 284 **interactions**

285 Results presented in this paper show that the centrifuge assay can quantify effects of  
286 root hair morphology on plant-substrate adhesion. By using well-characterized Arabidopsis  
287 root hair mutants, we demonstrate that this assay can evaluate the adhesive properties of  
288 mutants with a wide variety of root hair phenotypes. Previous work has shown that the  
289 presence of root hairs can significantly enhance root-substrate adhesion compared to the  
290 absence of root hairs (De Baets et al., 2020; Haling et al., 2013). Indeed, our centrifuge assay  
291 has previously been used to compare the forces required to detach seedlings with and without  
292 root hairs (De Baets et al., 2020); however, the sensitivity of the assay for comparing how  
293 root hair morphology affects root-substrate adhesion was not evaluated. We now show that  
294 this assay can distinguish the adherence strength of seedlings with altered root hair shapes  
295 and sizes (Figure 2), quantifying the contribution of these morphological traits to plant-  
296 substrate interactions. Some mutants with defective root hairs have mutations in cell wall  
297 biosynthesis and modification proteins, so it is possible that altered root-substrate interfaces  
298 compromise adhesion in these mutants, not just root hair shape. Using our method to rapidly  
299 phenotype mutants with root hair growth defects could direct additional experiments to  
300 characterize biochemical and morphological properties of genes of interest.

301

### 302 **Identifying new genes involved in root-substrate adhesion**

303 Mutations in cellular functions that do not alter root hair growth but do affect  
304 substrate adhesion can also be investigated using this assay. Vesicle trafficking pathways are  
305 required for cell wall deposition and maintenance (De Caroli et al., 2011; Larson et al., 2014;  
306 Rodriguez-Furlán et al., 2016); therefore, we hypothesized that mutants in trafficking  
307 pathways, particularly those at the plasma membrane, could affect root-substrate adhesion.  
308 Similarly, the composition and deposition of plant exudates help plants modify and optimize  
309 their growth conditions (Carvalhais et al., 2015; Naveed et al., 2017), suggesting that  
310 modification to plant exudate composition could affect root-substrate interactions. Consistent

311 with these hypotheses, mutants with vesicle trafficking defects and altered exudate  
312 composition have root-substrate adhesion properties that differ from wild type, indicating that  
313 this method can identify aspects of plant biology important for root-substrate interactions that  
314 do not affect root or root hair morphology (Figures 3 and 4). Our results further indicate that  
315 while root hairs provide significant adhesive and cohesive support both on solid gel and soil  
316 media (De Baets et al., 2020), there are additional cellular factors contributing to plant-  
317 substrate interactions that are not directly observable without the use of expensive antibodies,  
318 development of time-intensive transgenic lines, and microscopy equipment. Our centrifuge  
319 assay provides an affordable and quick alternative to these current methodologies.

320 We used this assay as a screen to identify new genes affecting plant-substrate  
321 interactions. As an example, we report the identification in a forward genetics screen of a  
322 mutant population in which *abcg43* mutant seedlings were more adhesive to gel than wild  
323 type. The function of ABCG43 in Arabidopsis is uncharacterised and therefore, this assay is a  
324 promising tool for identifying novel candidate genes that have no known association with  
325 root morphological defects, adhesion or exudate composition for future study.

326

## 327 **CONCLUSION**

328 This assay has applications in plant cell biology and genetics to understand how gene  
329 activity, cell function and root structure affect plant-soil adhesion and identify the molecular  
330 pathways involved. Potential applications include measuring variables not tested in this  
331 report, such as the effects of environmental conditions on plant-substrate adhesion and how  
332 other plant species or ecotypes respond to detachment forces. Given the recent discovery that  
333 root hair presence is important for Arabidopsis cohesion between roots and gel, and compost  
334 or soil (De Baets *et al.*, 2020), this assay could contribute to plant and soil sciences more  
335 broadly through the identification of plant traits that increase root-substrate cohesion and  
336 potentially stabilise slopes or reduce soil erosion.

337

## 338 **METHODS**

### 339 **Plant material & growth conditions**

340 Candidate lines of the Columbia-0 (Col-0) ecotype of *Arabidopsis thaliana* with T-  
341 DNA insertions or point mutations were obtained from the Nottingham Arabidopsis Stock  
342 Centre (NASC; Nottingham, UK) or were from stocks maintained in the lab (Table 1). Wild-  
343 type plants for all experiments were also the Col-0 ecotype. Homozygous lines of *csld3*,  
344 *cow1-3*, *lrx1-4*, *roll1-2*, *gdi1-2*, *chc1-2*, *chc2-3*, *syp121*, *syp122*, *jin1-9*, *pft1-3* and *pdr2* were



345 used in all experiments. Homozygosity of the *abcg43* mutant alleles was confirmed by  
346 genomic PCR analysis.

347 For all experiments, seeds were surface sterilised for 15 min in a solution containing  
348 20% bleach and sterile water, followed by five washes in sterile water. All sterilised seeds  
349 were stratified in the dark at 4°C for 24-48 h in Eppendorf microtubes containing sterile  
350 water. All plants were reared in a growth room at 21-22°C with a continuous photoperiod  
351 (light intensity = 120-145  $\mu\text{mol m}^{-2} \text{s}^{-1}$ ) at 60% humidity.

352 For the centrifuge assay and morphological root trait analyses, sterile seeds were  
353 sown onto 90-mm Petri plates (Thermo Scientific RC2260). Ten seeds were sown in two  
354 rows of five on a single Petri plate containing 30 ml sterile gel medium and sealed with  
355 Parafilm (Bemis, NA). The gel consisted of half strength Murashige and Skoog basal medium  
356 (Sigma M5519) with 1% [w/v] sucrose pH adjusted to 5.7, solidified with 1% [w/v] agar  
357 (Sigma A1296). Seed-sown plates were placed upright at  $\sim 80^\circ$  from the horizontal (lid side  
358 down) to encourage vertical growth along the gel surface. Plants for genomic DNA  
359 extractions were grown in compost (three parts Levington F3 compost and one-part J Arthur  
360 Bowers horticultural silver sand).

361

### 362 **Identification of *abcg43-1* mutant T-DNA insert**

363 Genomic DNA was extracted from a pool of vegetative tissue taken from ten three-  
364 week old plants using an adapted protocol (Healey et al., 2014) for Illumina Next-Generation  
365 two x paired-end sequencing conducted at the Bristol Genomics Facility. The Illumina  
366 TruSeq Nano LT gDNA kit (Illumina Inc) was used to generate a genomic DNA sequencing  
367 library following the manufacturer's protocol. The final library was diluted to a loading  
368 concentration of 1.4 pM for cluster generation and 2 x 150 bp paired-end sequencing on the  
369 Illumina NextSeq500 system (Illumina Inc) alongside a 5% PhiX spike-in control library.  
370 Read summary statistics were generated using the RTA 2.4.6 Primary Analysis Software  
371 (Illumina Inc). The read summaries were analysed in the Sequencing Analysis Viewer  
372 (Illumina). Filtered paired reads were subject to paired-end alignment using the Bowtie2  
373 2.3.4.2 aligner (Langmead and Salzberg, 2012). A bespoke reference genome was produced  
374 that combined the TAIR10 Arabidopsis genome (Lamesch et al., 2012) and the pROK2  
375 vector sequence (Baulcombe et al., 1986). Alignments were viewed in the Integrative  
376 Genomics Viewer IGV 2.3 (Robinson et al., 2011).

377 For Sanger sequencing, DNA was extracted from a pool of vegetative tissue taken  
378 from two-week-old plants using a modified Edwards prep (Edwards et al., 1991). High



379 fidelity PCR was conducted on the *abcg43-1* line using the Q5 High-Fidelity 2X Master Mix  
380 (NEB). PCR products were purified and extracted from a 1% agarose gel using the QIAquick  
381 Gel Extraction Kit (QIAGEN), following the manufacturer's instructions. Purified PCR  
382 product plus the *abcg43-1* forward, reverse or border genotyping primer (Supplemental Table  
383 1) was used for Sanger sequencing (using the Mix2Seq overnight sequencing kit, Eurofins  
384 Genomics). Chromatograms and FASTA files were obtained from Eurofin Genomics and  
385 following manual low-quality end trimming, the final sequences were aligned to the pROK2  
386 vector sequence and *ABCG43* gene sequence using the MUSCLE alignment tool (Edgar,  
387 2004).

388

### 389 **Genotyping**

390 To genotype the *abcg43* mutant alleles, genomic DNA was extracted from the  
391 vegetative tissue of two-week-old plants using a modified Edwards prep (Edwards et al.,  
392 1991). T-DNA border and gene-specific primers were used in PCR analyses to confirm the  
393 genotype (Supplemental Table 1).

394

### 395 **Centrifuge assay set-up**

396 After 5-6 days of growth, plates were placed in an inverted orientation into a hanging  
397 basket centrifuge (Beckman Allegra X-30R Centrifuge) and subjected to incremental  
398 increases of centrifugal force between 720 and 1611 RPM for one minute at a time; the  
399 proportion of seedlings that detached from the gel surface was recorded between each speed.  
400 The individual weight of aerial tissue for each seedling was measured using an analytical  
401 balance (Microbalance ME5; Sartorius). Centrifugal force,  $F_c$  (mN) acting on a seedling was  
402 calculated as previously reported in De Baets et al. (2020). Aerial tissue weight (kg), the  
403 angular velocity ( $\omega$ ) and the distance between the seedling and the axis of rotation on the  
404 centrifuge (radius = 0.07m) were used to give the following equation:

405

$$406 F_c = mass \times radius \times \omega^2 \quad \text{(Equation 1)}$$

407

408 The root-gel detachment of at least 70 plants from each line was assessed within a  
409 single experiment. This replicate size was determined by preliminary experiments we  
410 conducted during assay development.

411

### 412 **Morphological root trait analyses**

413 Five-day-old Arabidopsis seedlings were imaged with a Leica MZ FLIII microscope  
414 (Leica) with dark-field lighting. Root hair length and density were measured using  
415 microscope images of five-day-old Arabidopsis seedlings and Fiji version 1.0 (Schindelin et  
416 al., 2012), using the Bio-Formats Importer plugin to load images into Fiji. At least two  
417 experimental repeats were conducted; in each experiment we imaged eight to ten individual  
418 plants from each line and measured at least 30 root hairs per plant.

419

## 420 **Statistical analyses**

421 All statistical analyses were conducted using RStudio, version 1.1453 (R Core Team,  
422 2014) and all graphs were generated using the R package ggplot2 (Wickham, 2016).

423 For the centrifuge assay, we applied a Cox proportional hazards (PH) regression  
424 model to statistically test for differences between the rate of detachment of candidate lines  
425 relative to the wild type line (see results section). This analysis used the coxph function  
426 within the survival package in R and in all cases, the assumption of proportionality was  
427 satisfied. Comparisons of different candidate lines relative to the wild type line were analysed  
428 *a priori*; therefore, a series of contrasts were set up using the R function `contr.treatment`  
429 rather than using post-hoc testing methods. We censored seedlings that remained attached to  
430 the gel after the maximum centrifugal speed because we did not determine the speed these  
431 seedlings would have detached from the gel. Seedling position and the individual plate  
432 number were incorporated in the model as covariate factors; when these covariates had no  
433 significant effect, they were removed from the model. For each Cox PH regression model  
434 run, we report the P value of the Wald Statistic (z-score) and the hazard ratio with the upper  
435 and lower bound confidence intervals. A statistical level of 1% (0.01) was used.

436 To statistically test for differences between candidate lines relative to wild type plants  
437 for each of the root trait parameters measured, univariate analyses were conducted using the  
438 `lm` function in R. In all cases, the assumptions of normality and homoscedasticity were  
439 satisfied. Because comparisons of different mutant lines relative to the wild type line were set  
440 up *a priori*, a series of contrasts were set up using the `contr.treatment` function in R. To  
441 prevent type I errors from multiple testing, we applied the Bonferroni method and adjusted  
442 the alpha level to 0.025 (0.05/2).

443

## 444 **SUPPLEMENTAL DATA**

445 **Supplemental Table 1.** Genotyping primers used in this study

446 **Supplemental Table 2.** Centrifuge assay troubleshooting

447

## 448 **ACKNOWLEDGEMENTS**

449 This work was supported by a Leverhulme Trust project grant RPG-2013-260 to CSG and  
450 TBL and BME was supported by a BBSRC SWBio PhD studentship (grant BB/M009122/1).

451 We are thankful to Don Grierson FRS and Enrico Coen FRS who independently suggested  
452 the centrifuge assay concept, Timothy Quine for providing insightful guidance during method  
453 development, and Thomas Denbigh for providing essential technical advice. We are grateful  
454 to Jill Harrison, Victoria Spencer, Zoe Nemeč Venza, Sophie Carpenter and Nicholas H Fair  
455 for their helpful comments during revision of the manuscript.

456

## 457 **AUTHOR CONTRIBUTIONS**

458 CSG designed the initial project, conducted proof-of-concept pilot experiments, obtained the  
459 funding, recruited the team and advised. TBL and IC developed the theoretical  
460 parametrisation of the centrifugal assay and bounds on the errors from other mechanical  
461 forces. BME and ERL planned and conducted all experiments apart from the genetic screen,  
462 which was carried out by LW and KMS. BME and ERL analysed all of the data presented  
463 herein. ANS and BME optimised the centrifuge assay data collection and data analysis  
464 methods. BME and ERL wrote the initial manuscript. BME, ERL, and CSG edited the  
465 manuscript. All authors reviewed and approved the final manuscript.

466

467

## 468 **REFERENCES**

469 Akhtar, J., Galloway, A.F., Nikolopoulos, G., Field, K.J., and Knox, P. (2018). A quantitative method  
470 for the high throughput screening for the soil adhesion properties of plant and microbial  
471 polysaccharides and exudates. *Plant Soil* 428, 57–65.

472 Allison, P.D. (2010). *Survival Analysis Using SAS: A Practical Guide, Second Edition* (SAS  
473 Institute).

474 Alonso, J.M., Stepanova, A.N., Leisse, T.J., Kim, C.J., Chen, H., Shinn, P., Stevenson, D.K.,  
475 Zimmerman, J., Barajas, P., Cheuk, R., et al. (2003). Genome-wide insertional mutagenesis of  
476 *Arabidopsis thaliana*. *Science* 301, 653–657.

477 Assaad, F.F., Qiu, J.-L., Youngs, H., Ehrhardt, D., Zimmerli, L., Kalde, M., Wanner, G., Peck, S.C.,  
478 Edwards, H., Ramonell, K., et al. (2004). The PEN1 Syntaxin Defines a Novel Cellular Compartment  
479 upon Fungal Attack and Is Required for the Timely Assembly of Papillae. *Mol. Biol. Cell* 15, 5118–  
480 5129.

481 Badri, D.V., Loyola-Vargas, V.M., Broeckling, C.D., De-la-Peña, C., Jasinski, M., Santelia, D.,  
482 Martinoia, E., Sumner, L.W., Banta, L.M., Stermitz, F., et al. (2008). Altered Profile of Secondary

- 483 Metabolites in the Root Exudates of Arabidopsis ATP-Binding Cassette Transporter Mutants. *Plant*  
484 *Physiology* *146*, 762–771.
- 485 Badri, D.V., Quintana, N., El Kassis, E.G., Kim, H.K., Choi, Y.H., Sugiyama, A., Verpoorte, R.,  
486 Martinoia, E., Manter, D.K., and Vivanco, J.M. (2009). An ABC transporter mutation alters root  
487 exudation of phytochemicals that provoke an overhaul of natural soil microbiota. *Plant Physiol.* *151*,  
488 2006–2017.
- 489 Baets, S.D., Poesen, J., Knapen, A., and Galindo, P. (2007). Impact of root architecture on the  
490 erosion-reducing potential of roots during concentrated flow. *Earth Surface Processes and Landforms*  
491 *32*, 1323–1345.
- 492 Bailey, P.H.J., Currey, J.D., and Fitter, A.H. (2002). The role of root system architecture and root  
493 hairs in promoting anchorage against uprooting forces in *Allium cepa* and root mutants of *Arabidopsis*  
494 *thaliana*. *J. Exp. Bot.* *53*, 333–340.
- 495 Baulcombe, D.C., Saunders, G.R., Bevan, M.W., Mayo, M.A., and Harrison, B.D. (1986). Expression  
496 of biologically active viral satellite RNA from the nuclear genome of transformed plants. *Nature* *321*,  
497 446–449.
- 498 Baumberger, N., Ringli, C., and Keller, B. (2001). The chimeric leucine-rich repeat/extensin cell wall  
499 protein LRX1 is required for root hair morphogenesis in *Arabidopsis thaliana*. *Genes Dev.* *15*, 1128–  
500 1139.
- 501 Berger, S., Bell, E., and Mullet, J.E. (1996). Two Methyl Jasmonate-Insensitive Mutants Show  
502 Altered Expression of AtVsp in Response to Methyl Jasmonate and Wounding. *Plant Physiology* *111*,  
503 525–531.
- 504 Bliss, K.M., Jones, R.H., Mitchell, R.J., and Mou, P.P. (2002). Are competitive interactions  
505 influenced by spatial nutrient heterogeneity and root foraging behavior? *New Phytologist* *154*, 409–  
506 417.
- 507 Böhme, K., Li, Y., Charlot, F., Grierson, C., Marrocco, K., Okada, K., Laloue, M., and Nogué, F.  
508 (2004). The *Arabidopsis* COW1 gene encodes a phosphatidylinositol transfer protein essential for root  
509 hair tip growth. *Plant J.* *40*, 686–698.
- 510 Burylo, M., Rey, F., Mathys, N., and Dutoit, T. Plant root traits affecting the resistance of soils to  
511 concentrated flow erosion. *Earth Surface Processes and Landforms* *37*, 1463–1470.
- 512 Carol, R.J., Takeda, S., Linstead, P., Durrant, M.C., Kakesova, H., Derbyshire, P., Drea, S., Zarsky,  
513 V., and Dolan, L. (2005). A RhoGDP dissociation inhibitor spatially regulates growth in root hair  
514 cells. *Nature* *438*, 1013–1016.
- 515 Carvalhais, L.C., Dennis, P.G., Badri, D.V., Kidd, B.N., Vivanco, J.M., and Schenk, P.M. (2015).  
516 Linking Jasmonic Acid Signaling, Root Exudates, and Rhizosphere Microbiomes. *Mol. Plant Microbe*  
517 *Interact.* *28*, 1049–1058.
- 518 Cox, D.R., and Oakes, D. (1984). *Analysis of Survival Data* (Boca Raton, Florida: Chapman &  
519 Hall/CRC Press).
- 520 Datta, S., kim, C.M., Pernas, M., Pires, N.D., Proust, H., Tam, T., Vijayakumar, P., and Dolan, L.  
521 (2011). Root hairs: development, growth and evolution at the plant-soil interface. *Plant and Soil* *346*,  
522 1–14.

- 523 De Baets, S., and Poesen, J. (2010). Empirical models for predicting the erosion-reducing effects of  
524 plant roots during concentrated flow erosion. *Geomorphology* *118*, 425–432.
- 525 De Baets, S., Denbigh, T.D., Smyth, K.M., Eldridge, B.M., Weldon, L.M., Higgins, B.W.,  
526 Matyjaszkiewicz, A.W., Meersmans, J., Larson, E.R., Chenchiah, I.V., et al. (2020). Micro-scale  
527 interactions between Arabidopsis root hairs and soil particles influence soil erosion. *Nature Comms*  
528 *Biol* *3*, 1–11.
- 529 De Caroli, M., Lenucci, M.S., Di Sansebastiano, G.-P., Dalessandro, G., De Lorenzo, G., and Piro, G.  
530 (2011). Dynamic protein trafficking to the cell wall. *Plant Signal Behav* *6*, 1012–1015.
- 531 Devarajan, K., and Ebrahimi, N. (2009). Testing for Covariate Effect in the Cox Proportional Hazards  
532 Regression Model. *Commun Stat Theory Methods* *38*, 2333–2347.
- 533 Diet, A., Link, B., Seifert, G.J., Schellenberg, B., Wagner, U., Pauly, M., Reiter, W.-D., and Ringli, C.  
534 (2006). The Arabidopsis root hair cell wall formation mutant *lrx1* is suppressed by mutations in the  
535 *RHM1* gene encoding a UDP-L-rhamnose synthase. *Plant Cell* *18*, 1630–1641.
- 536 Edwards, K., Johnstone, C., and Thompson, C. (1991). A simple and rapid method for the preparation  
537 of plant genomic DNA for PCR analysis. *Nucleic Acids Res* *19*, 1349.
- 538 Eisenach, C., Chen, Z.-H., Grefen, C., and Blatt, M.R. (2012). The trafficking protein SYP121 of  
539 Arabidopsis connects programmed stomatal closure and K<sup>+</sup> channel activity with vegetative growth.  
540 *Plant J.* *69*, 241–251.
- 541 Favery, B., Ryan, E., Foreman, J., Linstead, P., Boudonck, K., Steer, M., Shaw, P., and Dolan, L.  
542 (2001). KOJAK encodes a cellulose synthase-like protein required for root hair cell morphogenesis in  
543 Arabidopsis. *Genes Dev.* *15*, 79–89.
- 544 Federle, W., Rohrseitz, K., and Holldobler, B. (2000). Attachment forces of ants measured with a  
545 centrifuge: better ‘wax-runners’ have a poorer attachment to a smooth surface. *Journal of*  
546 *Experimental Biology* *203*, 505–512.
- 547 Galloway, A.F., Pedersen, M.J., Merry, B., Marcus, S.E., Blacker, J., Benning, L.G., Field, K.J., and  
548 Knox, J.P. (2018). Xyloglucan is released by plants and promotes soil particle aggregation. *New*  
549 *Phytol.* *217*, 1128–1136.
- 550 Gao, D., Knight, M.R., Trewavas, A.J., Sattelmacher, B., and Plieth, C. (2004). Self-reporting  
551 Arabidopsis expressing pH and [Ca<sup>2+</sup>] indicators unveil ion dynamics in the cytoplasm and in the  
552 apoplast under abiotic stress. *Plant Physiol.* *134*, 898–908.
- 553 Geelen, D., Leyman, B., Batoko, H., Di Sansebastiano, G.-P., Moore, I., Blatt, M.R., and Di  
554 Sansabastiano, G.-P. (2002). The abscisic acid-related SNARE homolog NtSyr1 contributes to  
555 secretion and growth: evidence from competition with its cytosolic domain. *Plant Cell* *14*, 387–406.
- 556 Ghestem, M., Cao, K., Ma, W., Rowe, N., Leclerc, R., Gadenne, C., and Stokes, A. (2014). A  
557 framework for identifying plant species to be used as “ecological engineers” for fixing soil on  
558 unstable slopes. *PLoS ONE* *9*, e95876.
- 559 Grierson, C.S., Roberts, K., Feldmann, K.A., and Dolan, L. (1997). The COW1 locus of arabidopsis  
560 acts after RHD2, and in parallel with RHD3 and TIP1, to determine the shape, rate of elongation, and  
561 number of root hairs produced from each site of hair formation. *Plant Physiol* *115*, 981–990.

- 562 Haling, R.E., Brown, L.K., Bengough, A.G., Young, I.M., Hallett, P.D., White, P.J., and George, T.S.  
563 (2013). Root hairs improve root penetration, root-soil contact, and phosphorus acquisition in soils of  
564 different strength. *J. Exp. Bot.* *64*, 3711–3721.
- 565 Healey, A., Furtado, A., Cooper, T., and Henry, R.J. (2014). Protocol: a simple method for extracting  
566 next-generation sequencing quality genomic DNA from recalcitrant plant species. *Plant Methods* *10*,  
567 21.
- 568 Huang, Y., Wang, Y., Tan, L., Sun, L., Petrosino, J., Cui, M.-Z., Hao, F., and Zhang, M. (2016).  
569 Nanospherical arabinogalactan proteins are a key component of the high-strength adhesive secreted  
570 by English ivy. *Proc. Natl. Acad. Sci. U.S.A.* *113*, E3193-3202.
- 571 Kang, J., Yim, S., Choi, H., Kim, A., Lee, K.P., Lopez-Molina, L., Martinoia, E., and Lee, Y. (2015).  
572 Abscisic acid transporters cooperate to control seed germination. *Nat Commun* *6*, 8113.
- 573 Kidd, B.N., Edgar, C.I., Kumar, K.K., Aitken, E.A., Schenk, P.M., Manners, J.M., and Kazan, K.  
574 (2009). The mediator complex subunit PFT1 is a key regulator of jasmonate-dependent defense in  
575 Arabidopsis. *Plant Cell* *21*, 2237–2252.
- 576 Kitakura, S., Vanneste, S., Robert, S., Löffke, C., Teichmann, T., Tanaka, H., and Friml, J. (2011).  
577 Clathrin mediates endocytosis and polar distribution of PIN auxin transporters in Arabidopsis. *Plant*  
578 *Cell* *23*, 1920–1931.
- 579 Lamesch, P., Berardini, T.Z., Li, D., Swarbreck, D., Wilks, C., Sasidharan, R., Muller, R., Dreher, K.,  
580 Alexander, D.L., Garcia-Hernandez, M., et al. (2012). The Arabidopsis Information Resource (TAIR):  
581 improved gene annotation and new tools. *Nucleic Acids Res.* *40*, D1202-1210.
- 582 Langmead, B., and Salzberg, S.L. (2012). Fast gapped-read alignment with Bowtie 2. *Nat Methods* *9*,  
583 357–359.
- 584 Larson, E.R., Domozych, D.S., and Tierney, M.L. (2014). SNARE VTI13 plays a unique role in  
585 endosomal trafficking pathways associated with the vacuole and is essential for cell wall organization  
586 and root hair growth in arabidopsis. *Ann. Bot.* *114*, 1147–1159.
- 587 Larson, E.R., Van Zelm, E., Roux, C., Marion-Poll, A., and Blatt, M.R. (2017). Clathrin Heavy Chain  
588 Subunits Coordinate Endo- and Exocytic Traffic and Affect Stomatal Movement. *Plant Physiol.* *175*,  
589 708–720.
- 590 Lorenzo, O., Chico, J.M., Sánchez-Serrano, J.J., and Solano, R. (2004). JASMONATE-  
591 INSENSITIVE1 encodes a MYC transcription factor essential to discriminate between different  
592 jasmonate-regulated defense responses in Arabidopsis. *Plant Cell* *16*, 1938–1950.
- 593 Miller, R.G. (1998). *Survival Analysis* (New York: Wiley & Sons).
- 594 Naveed, M., Brown, L.K., Raffan, A.C., George, T.S., Bengough, A.G., Roose, T., Sinclair, I.,  
595 Koebernick, N., Cooper, L., Hackett, C.A., et al. (2017). Plant exudates may stabilize or weaken soil  
596 depending on species, origin and time. *European Journal of Soil Science* *68*, 806–816.
- 597 Parker, J.S., Cavell, A.C., Dolan, L., Roberts, K., and Grierson, C.S. (2000). Genetic interactions  
598 during root hair morphogenesis in Arabidopsis. *Plant Cell* *12*, 1961–1974.
- 599 Prentice, R.L., and Kalbfleisch, J.D. (2003). Mixed discrete and continuous Cox regression model.  
600 *Lifetime Data Anal* *9*, 195–210.



- 601 R Core Team (2014). R: A language and environment for statistical computing (Vienna, Austria: R  
602 Foundation for Statistical Computing).
- 603 Ringli, C., Bigler, L., Kuhn, B.M., Leiber, R.-M., Diet, A., Santelia, D., Frey, B., Pollmann, S., and  
604 Klein, M. (2008). The Modified Flavonol Glycosylation Profile in the Arabidopsis rol1 Mutants  
605 Results in Alterations in Plant Growth and Cell Shape Formation. *The Plant Cell* 20, 1470–1481.
- 606 Robinson, D.G., Scheuring, D., Naramoto, S., and Friml, J. (2011). ARF1 localizes to the golgi and  
607 the trans-golgi network. *Plant Cell* 23, 846–849; author reply 849-850.
- 608 Rodriguez-Furlán, C., Salinas-Grenet, H., Sandoval, O., Recabarren, C., Arraño-Salinas, P., Soto-  
609 Alvear, S., Orellana, A., and Blanco-Herrera, F. (2016). The Root Hair Specific SYP123 Regulates  
610 the Localization of Cell Wall Components and Contributes to Rizhobacterial Priming of Induced  
611 Systemic Resistance. *Front Plant Sci* 7, 1081.
- 612 Schindelin, J., Arganda-Carreras, I., Frise, E., Kaynig, V., Longair, M., Pietzsch, T., Preibisch, S.,  
613 Rueden, C., Saalfeld, S., Schmid, B., et al. (2012). Fiji: an open-source platform for biological-image  
614 analysis. *Nat. Methods* 9, 676–682.
- 615 Sedgwick, P. (2014). How to read a Kaplan-Meier survival plot. *BMJ* 349, g5608.
- 616 Šmilauerová, M. (2001). Plant root response to heterogeneity of soil resources: Effects of nutrient  
617 patches, AM symbiosis, and species composition. *Folia Geobot* 36, 337–351.
- 618 Stokes, A., Atger, C., Bengough, A.G., Fourcard, T., and Sidle, R.C. (2009). Desirable plant root  
619 traits for protecting natural and engineered slopes against landslides. *Plant and Soil* 324, 1–30.
- 620 Toukura, Y., Devee, E., and Hongo, A. (2006). Uprooting and shearing resistances in the seedlings of  
621 four weedy species. *Weed Biology and Management* 6, 35–43.
- 622 Waghmare, S., Lileikyte, E., Karnik, R., Goodman, J.K., Blatt, M.R., and Jones, A.M.E. (2018).  
623 SNAREs SYP121 and SYP122 Mediate the Secretion of Distinct Cargo Subsets. *Plant Physiology*  
624 178, 1679–1688.
- 625 Wickham, H. (2016). *ggplot2: Elegant Graphics for Data Analysis* (Springer).
- 626 Yang, J., Bak, G., Burgin, T., Barnes, W.J., Mayes, H.B., Peña, M.J., Urbanowicz, B.R., and Nielsen,  
627 E. (2020). Biochemical and Genetic Analysis Identify CSLD3 as a beta-1,4-Glucan Synthase That  
628 Functions during Plant Cell Wall Synthesis. *Plant Cell* 32, 1749–1767.
- 629 Yi, K., Menand, B., Bell, E., and Dolan, L. (2010). A basic helix-loop-helix transcription factor  
630 controls cell growth and size in root hairs. *Nat. Genet.* 42, 264–267.
- 631
- 632



633 **TABLE**

634 **Table 1** *Arabidopsis* mutant lines used in this study

| <b>Mutant type</b>       | <b>Mutant</b>   | <b>AGI code<sup>a</sup></b> | <b>Mutant line</b>  | <b>Referenced in</b>          |
|--------------------------|-----------------|-----------------------------|---------------------|-------------------------------|
| Root hair shape          | <i>cow1-3</i>   | At4g34580                   | SALK_0021245        | Böhme <i>et al.</i> (2004)    |
|                          | <i>csld3-1</i>  | At3g03050                   | CS899               | Favery <i>et al.</i> (2001)   |
|                          | <i>lrx1-4</i>   | At1g12040                   | SALK_057038         | Kim <i>et al.</i> (2006)      |
|                          | <i>rol1-2</i>   | At1g78570                   | CS16373             | Diet <i>et al.</i> (2006)     |
|                          | <i>gdi1-2</i>   | At3g07880                   | SALK_035400         | Kang <i>et al.</i> (2017)     |
| Vesicle trafficking      | <i>chc1-2</i>   | At3g11130                   | SALK_103252         | Kitakura <i>et al.</i> (2011) |
|                          | <i>chc2-3</i>   | At3g08530                   | SALK_151638         | Bourdais <i>et al.</i> (2016) |
|                          | <i>syp121</i>   | At3g11820                   | -                   | Assaad <i>et al.</i> (2004)   |
|                          | <i>syp122-1</i> | At3g52400                   | SALK_008617         | Assaad <i>et al.</i> (2004)   |
| Root exudate composition | <i>jln1-9</i>   | At1g32640                   | SALK_017005         | Anderson <i>et al.</i> (2004) |
|                          | <i>pdr2</i>     | At4g15230                   | SAIL_811_F08        | Badri <i>et al.</i> (2008)    |
|                          | <i>pft1-3</i>   | At1g25540                   | SALK_059316         | Kidd <i>et al.</i> (2009)     |
| Unknown                  | <i>abcg43-1</i> | At4g15236                   | N75206 <sup>b</sup> | This study                    |
|                          | <i>abcg43-2</i> | At4g15236                   | SALK_201207         | This study                    |
|                          | <i>abcg43-3</i> | At4g15236                   | SALKseq_30713       | This study                    |

635 <sup>a</sup>AGI refers to the Arabidopsis Genome Initiative. <sup>b</sup> Refers to identification of the *abcg43-1*  
636 line from a pooled set of 100 SALK T-DNA insertion lines (stock number N75206, Alonso *et*  
637 *al.*, 2003).

638

639 **FIGURE LEGENDS**

640 **Figure 1. Centrifuge assay workflow.**

641 (A) i. Ten seeds (highlighted in pink) are sown onto the surface of sterile, solid gel growth  
642 medium in a single Petri plate in two horizontal rows. ii. The plates are stacked in groups of  
643 five and orientated vertically at approximately 80° to encourage the roots to grow down the  
644 surface of the gel medium. Plates are grown in a growth chamber with constant light (120-  
645 145  $\mu\text{mol m}^{-2} \text{s}^{-1}$ ) conditions at 22°C and 60% relative humidity.

646 (B) After 5-6 days, i. seedlings are visually analysed and numbered. ii. Petri plates are placed  
647 into a swing-out-bucket centrifuge in an inverted orientation with their roots pointing inward  
648 (indicated by the purple arrows). iii. After seedlings have been subjected to a one-minute  
649 pulses of increasing centrifugal speeds, seedling detachment is recorded.

650 (C) i. The aerial tissue mass of each seedling is determined using ii. an analytical scale to iii.  
651 determine the root-gel adhesion properties of candidate lines are compared to wild-type to  
652 assess whether they have increased (e.g. line y) or decreased (e.g. line x) adhesion to the  
653 sterile gel.

654

655 **Figure 2. Physical root hair properties contribute to root-substrate adhesion.**

656 (A) Root hair phenotypes of 5-d-old wild-type (Col-0), *lrx 1-4*, *csld3-1*, *cow1-3*, *roll-2*, and  
657 *gdi1-2* seedlings grown on gel medium and statistical comparisons of mean root hair density  
658 (number per mm length of root) and mean root hair length (mm) for each mutant line relative  
659 to wild type. White asterisks on the root hair images indicate the characteristic root hair  
660 bulging phenotype in the *lrx1-4* mutant and the short, branching root hair phenotype in *gdi1-*  
661 2. Scale bar = 0.5 mm. In the table, the mean  $\pm$  standard error is given for root hair density  
662 and root hair length of wild type and each mutant as well as a mean comparison to wild type,  
663 which is listed in bold. “No difference” is stated when there was no statistically significant  
664 difference between wild type and a mutant line. The statistical output of each univariate  
665 linear model is given. Significance: ‘\*\*\*\*’ = < 0.001, ‘\*\*\*’ = < 0.01.

666 Survival curves displaying the proportion of seedlings that adhered to the gel at increasing  
667 centrifugal force for (B) 92 wild type (Col-0 – black); 81 *lrx1-4* (light green); 70 *csld3-1*  
668 (green); (C) 82 wild type (Col-0 - black); 83 *cow1-3* (green); and (D) 77 wild type (Col-0-  
669 black); 85 *roll-2* (light green); and 86 *gdi1-2* (dark green). Circled red crosses on the survival  
670 curves represent seedlings that remained adhered to the gel after the maximum centrifugal  
671 speed (1611 RPM). The results shown are from a representative experiment for at least two

672 independent experiments showing a statistically significant difference in adhesion between  
673 mutant lines relative to wild type (Cox PH regression;  $\alpha = 0.001$ ). A single experiment  
674 included  $\geq 70$  biological replicates for each candidate line.

675

### 676 **Figure 3. Vesicle trafficking mechanisms that contribute to root-substrate adhesion**

677 **(A)** Root hair phenotypes of 5-d-old wild-type (Col-0), *syp121*, *syp122-1*, *chc1-2* and *chc2-3*  
678 seedlings grown on a gel medium and statistical comparisons of mean root hair density  
679 (number per mm length of root) and mean root hair length (mm) for each mutant line relative  
680 to wild type. Scale bar = 0.5 mm. In the table, the mean  $\pm$  standard error is given for the root  
681 hair density and root hair length of wild type and each mutant as well as a mean comparison  
682 to wild type, which is listed in bold. “No difference” is stated when there was no statistically  
683 significant difference between wild type and a mutant line. The statistical output of each  
684 univariate linear model is given.

685 Survival curves displaying the proportion of seedlings that adhered to the gel at increasing  
686 centrifugal force for **(B)** 87 wild type (Col-0 – black); 91 *syp121* (turquoise); 83 *syp122-1*  
687 (blue/grey); and **(C)** 83 wild type (Col-0 - black); 70 *chc1-2* (dark blue); and 72 *chc2-3*  
688 (medium blue). Red crosses circled on the survival curves represent seedlings that remained  
689 adhered to the gel after the maximum centrifugal speed (1611 RPM). The results shown are  
690 from a representative experiment for at least two independent experiments showing a  
691 statistically significant difference in adhesion between all mutant lines relative to wild type  
692 (Cox PH regression;  $\alpha = 0.001$ ). A single experiment included  $\geq 70$  biological replicates  
693 for each candidate line.

694

### 695 **Figure 4. Exudate composition changes root-substrate adhesion properties**

696 **(A)** Root hair phenotypes of 5-d-old wild-type (Col-0), *jin1-9*, *pdr2* and *pft1-3* seedlings  
697 grown on a gel medium and statistical comparisons of mean root hair density (number per  
698 mm length of root) and mean root hair length (mm) for each mutant line relative to wild type.  
699 Scale bar = 0.5 mm. In the table, the mean  $\pm$  standard error is given for the root hair density  
700 and root hair length of wild type and each mutant as well as a mean comparison to wild type,  
701 which is listed in bold. “No difference” is stated when there was no statistically significant  
702 difference between wild type and a mutant line. The statistical output of each univariate  
703 linear model is given.

704 **(B)** Survival curves displaying the proportion of seedlings that adhered to the gel at  
705 increasing centrifugal force for 80 wild type (Col-0 – black), 81 *jin1-9* (light pink), 80 *pdr2*

706 (light orange), and 81 *pft1-3* (dark orange). The results shown are from a representative  
707 experiment for at least two independent experiments showing a statistically significant  
708 difference in adhesion between mutant lines relative to wild type (Cox PH regression; alpha =  
709 0.001), except for *jin1-9*. A single experiment included  $\geq 70$  biological replicates for each  
710 candidate line.

711

712 **Figure 5. Using the centrifuge assay in a forward genetic screen to identify root-**  
713 **substrate adhesion mutants**

714 (A) T-DNA insert locations in *ABCG43* for each *abcg43* mutant allele, with insertions  
715 indicated by orange arrowheads. The *ABCG43* gene is located on chromosome four at  
716 position Chr4: 8,969,677-8,702,727 and contains 23 exons (dark green) and 22 introns (white  
717 gaps). *abcg43-1* has a T-DNA insert in the exon10/intron10 boundary, *abcg43-2*  
718 (SALK\_201207) has a T-DNA insert in exon 2 and *abcg43-3* (SALKseq\_30713) has a T-  
719 DNA insert in exon 3.

720 (B) Genomic PCR confirming the homozygosity of each *abcg43* mutant for the respective T-  
721 DNA inserts. Lanes 1 and 2 were loaded with the gene-specific and T-DNA-border PCR  
722 products from *abcg43* mutant lines. Lanes 3 and 4 were loaded with the gene-specific and T-  
723 DNA-border PCR products from a wild type (Col-0) genomic DNA template. Lanes 5 and 6  
724 were loaded with the water controls for the gene-specific and T-DNA-border PCR reactions,  
725 respectively. 'L' indicates the 100-bp ladder. The expected product sizes for the gene-specific  
726 PCRs were ~350 nt, ~1025 nt and ~1090 nt; the T-DNA-border PCR product sizes were ~400  
727 nt, ~550 nt and ~750 nt for *abcg43-1*, *abcg43-2* and *abcg43-3* alleles, respectively.

728 (C) Survival curves displaying the proportion of seedlings that adhered to the gel at  
729 increasing centrifugal force for 79 wild type (Col-0 – black), 70 *abcg43-1* (dark pink), 85  
730 *abcg43-2* (purple), and 73 *abcg43-3* (light purple). Red crosses circled on the survival curves  
731 represent seedlings that remained adhered to the gel after the maximum centrifugal speed  
732 (1611 RPM). The results are from a representative experiment for at least two independent  
733 experiments showing a statistically significant difference in adhesion between the mutant  
734 lines relative to wild type (Cox PH regression; alpha = 0.001). A single experiment included  
735  $\geq 70$  biological replicates for each candidate line.

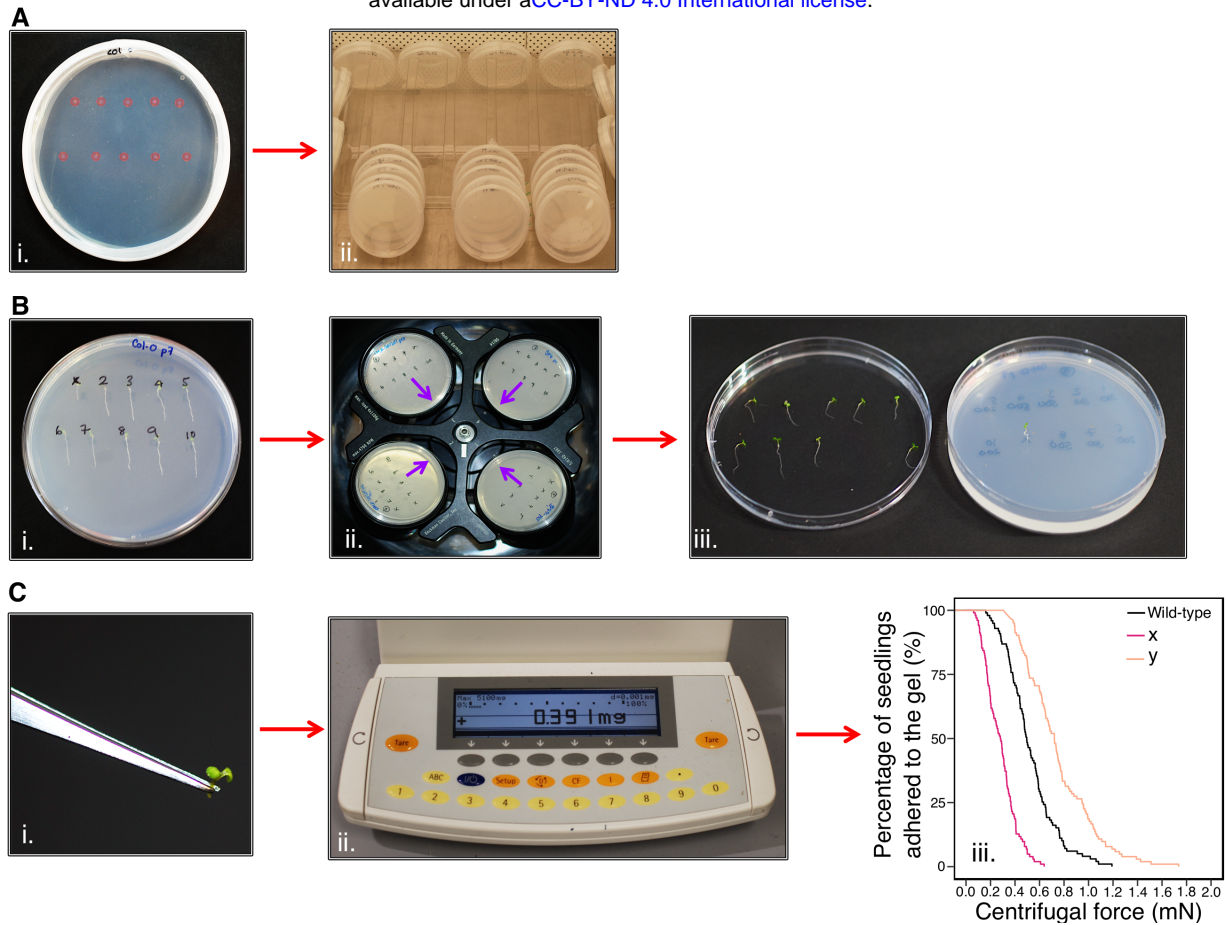

**Figure 1. Centrifuge assay workflow.**

(A) i. Ten seeds (highlighted in pink) are sown onto the surface of sterile, solid gel growth medium in a single Petri plate in two horizontal rows. ii. The plates are stacked in groups of five and orientated vertically at approximately 80° to encourage the roots to grow down the surface of the gel medium. Plates are grown in a growth chamber with constant light (120-145  $\mu\text{mol m}^{-2} \text{s}^{-1}$ ) conditions at 22°C and 60% relative humidity.

(B) After 5-6 days, i. seedlings are visually analysed and numbered. ii. Petri plates are placed into a swing-out-bucket centrifuge in an inverted orientation with their roots pointing inward (indicated by the purple arrows). iii. After seedlings have been subjected to a one-minute pulses of increasing centrifugal speeds, seedling detachment is recorded.

(C) i. The aerial tissue mass of each seedling is determined using ii. an analytical scale to iii. determine the root-gel adhesion properties of candidate lines are compared to wild-type to assess whether they have increased (e.g. line y) or decreased (e.g. line x) adhesion to the sterile gel.

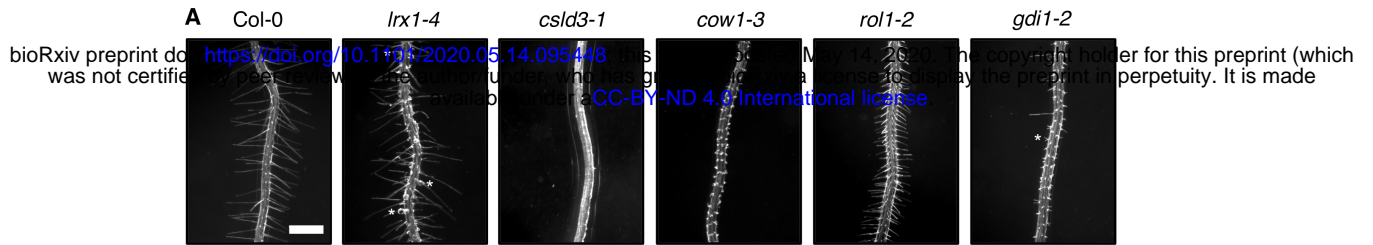

| Line           | Root hair density<br>(number per mm length of root) |                                           | Root hair length<br>(mm)                      |                                            |
|----------------|-----------------------------------------------------|-------------------------------------------|-----------------------------------------------|--------------------------------------------|
| Col-0          | 30.556 ± 0.784                                      | -                                         | 0.518 ± 0.009                                 | -                                          |
| <i>lrx1-4</i>  | 31.889 ± 0.935<br><b>No difference</b>              | t = 1.093, P > 0.05<br>d.f. = 16, n = 9   | 0.388 ± 0.008<br><b>1.3 times shorter**</b>   | t = -2.819, P < 0.001<br>d.f. = 16, n = 9  |
| <i>csld3-1</i> | 8.778 ± 1.188<br><b>3.5 times less***</b>           | t = -15.30, P < 0.001<br>d.f. = 16, n = 9 | 0.045 ± 0.002<br><b>10.1 times shorter***</b> | t = -11.790, P < 0.001<br>d.f. = 16, n = 9 |
| <i>cow1-3</i>  | 29.200 ± 0.772<br><b>No difference</b>              | t = -1.23, P > 0.05<br>d.f. = 17, n = 10  | 0.049 ± 0.001<br><b>10 times shorter***</b>   | t = -12.37, P < 0.001<br>d.f. = 17, n = 10 |
| <i>rol1-2</i>  | 30.700 ± 1.550<br><b>No difference</b>              | t = 0.08, P > 0.05<br>d.f. = 17, n = 9    | 0.195 ± 0.003<br><b>2.7 times shorter***</b>  | t = -8.417, P < 0.001<br>d.f. = 17, n = 10 |
| <i>gdi1-2</i>  | 26.200 ± 1.041<br><b>0.17 times less**</b>          | t = -3.282, P < 0.01<br>d.f. = 17, n = 9  | 0.135 ± 0.006<br><b>3.8 times shorter***</b>  | t = -9.04, P < 0.001<br>d.f. = 16, n = 9   |

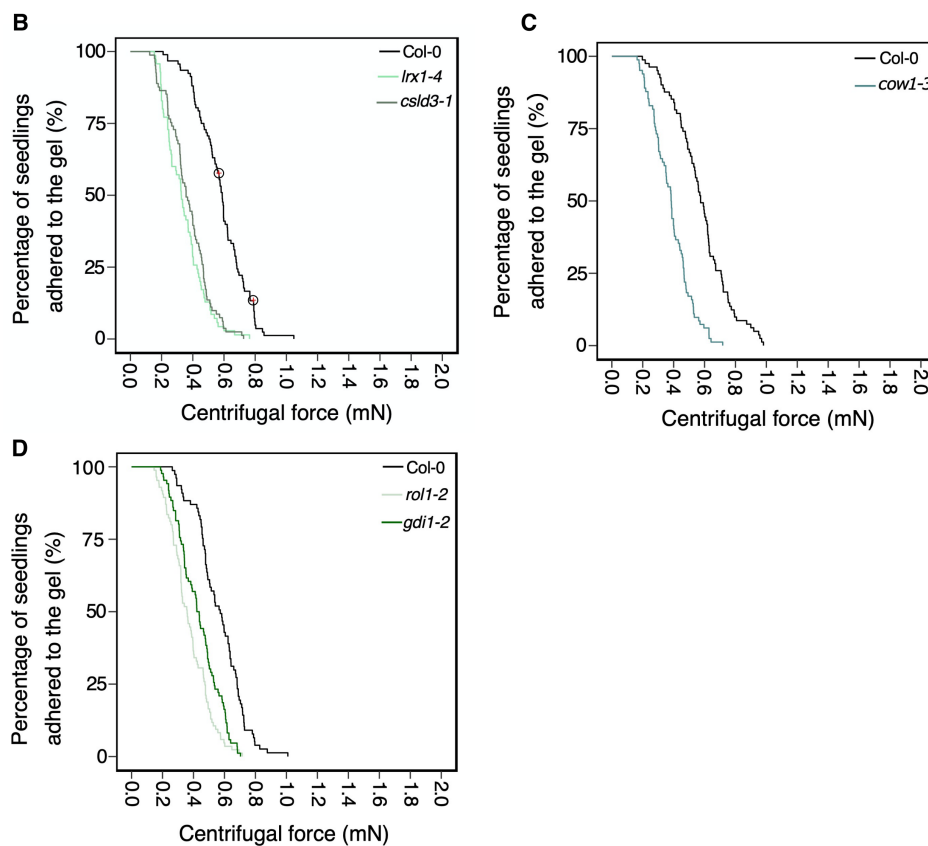

**Figure 2. Physical root hair properties contribute to root-substrate adhesion.**

**(A)** Root hair phenotypes of 5-d-old wild-type (Col-0), *lrx1-4*, *csld3-1*, *cow1-3*, *rol1-2*, and *gdi1-2* seedlings grown on gel medium and statistical comparisons of mean root hair density (number per mm length of root) and mean root hair length (mm) for each mutant line relative to wild type. White asterisks on the root hair images indicate the characteristic root hair bulging phenotype in the *lrx1-4* mutant and the short, branching root hair phenotype in *gdi1-2*. Scale bar = 0.5 mm. In the table, the mean ± standard error is given for root hair density and root hair length of wild type and each mutant as well as a mean comparison to wild type, which is listed in bold. “No difference” is stated when there was no statistically significant difference between wild type and a mutant line. The statistical output of each univariate linear model is given. Significance: ‘\*\*\*’ = < 0.001, ‘\*\*’ = < 0.01.

Survival curves displaying the proportion of seedlings that adhered to the gel at increasing centrifugal force for **(B)** 92 wild type (Col-0 – black); 81 *lrx1-4* (light green); 70 *csld3-1* (green); **(C)** 82 wild type (Col-0 - black);



83 *cow1-3* (green); and **(D)** 77 wild type (Col-0- black); 85 *rol1-2* (light green); and 86 *gdi1-2* (dark green). Circled red crosses on the survival curves represent seedlings that remained adhered to the gel after the maximum centrifugal speed (1611 RPM). The results shown are from a representative experiment for at least two independent experiments showing a statistically significant difference in adhesion between mutant lines relative to wild type (Cox PH regression; alpha = 0.001). A single experiment included  $\geq 70$  biological replicates for each candidate line.



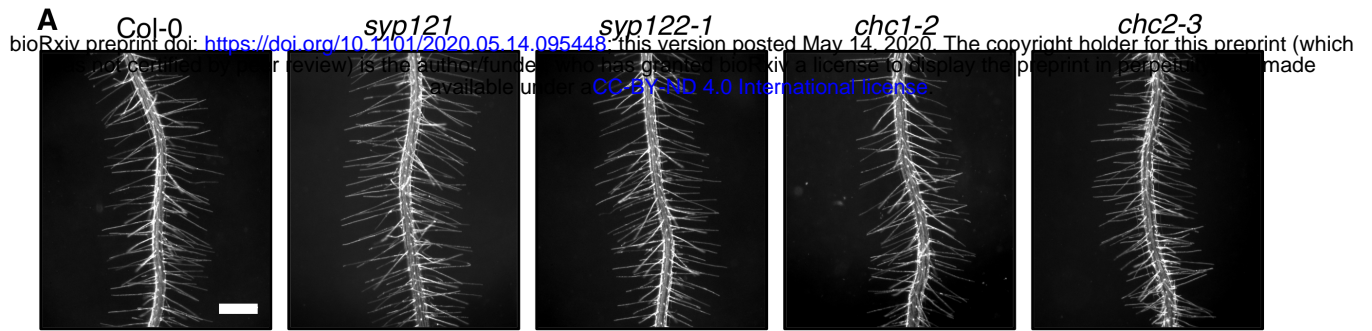

| Line            | Root hair density<br>(number per mm length of root) |                                           | Root hair length<br>(mm)              |                                          |
|-----------------|-----------------------------------------------------|-------------------------------------------|---------------------------------------|------------------------------------------|
|                 | Mean ± SE                                           | Comparison to Col-0                       | Mean ± SE                             | Comparison to Col-0                      |
| Col-0           | 32.000 ± 0.632                                      | -                                         | 0.420 ± 0.005                         | -                                        |
| <i>syp121</i>   | 31.200 ± 0.952<br><b>No difference</b>              | t = -0.700, P > 0.05<br>d.f. = 18, n = 10 | 0.461 ± 0.004<br><b>No difference</b> | t = 1.974, P > 0.05<br>d.f. = 18, n = 10 |
| <i>syp122-1</i> | 32.200 ± 0.442<br><b>No difference</b>              | t = 0.259, P > 0.05<br>d.f. = 18, n = 10  | 0.452 ± 0.005<br><b>No difference</b> | t = 1.379, P > 0.05<br>d.f. = 18, n = 10 |
| <i>chc1-2</i>   | 30.889 ± 0.716<br><b>No difference</b>              | t = -1.168, P > 0.05<br>d.f. = 17, n = 9  | 0.441 ± 0.006<br><b>No difference</b> | t = 0.684, P > 0.05<br>d.f. = 17, n = 9  |
| <i>chc2-3</i>   | 31.889 ± 0.790<br><b>No difference</b>              | t = -0.111, P > 0.05<br>d.f. = 17, n = 9  | 0.463 ± 0.006<br><b>No difference</b> | t = 0.182, P > 0.05<br>d.f. = 18, n = 10 |

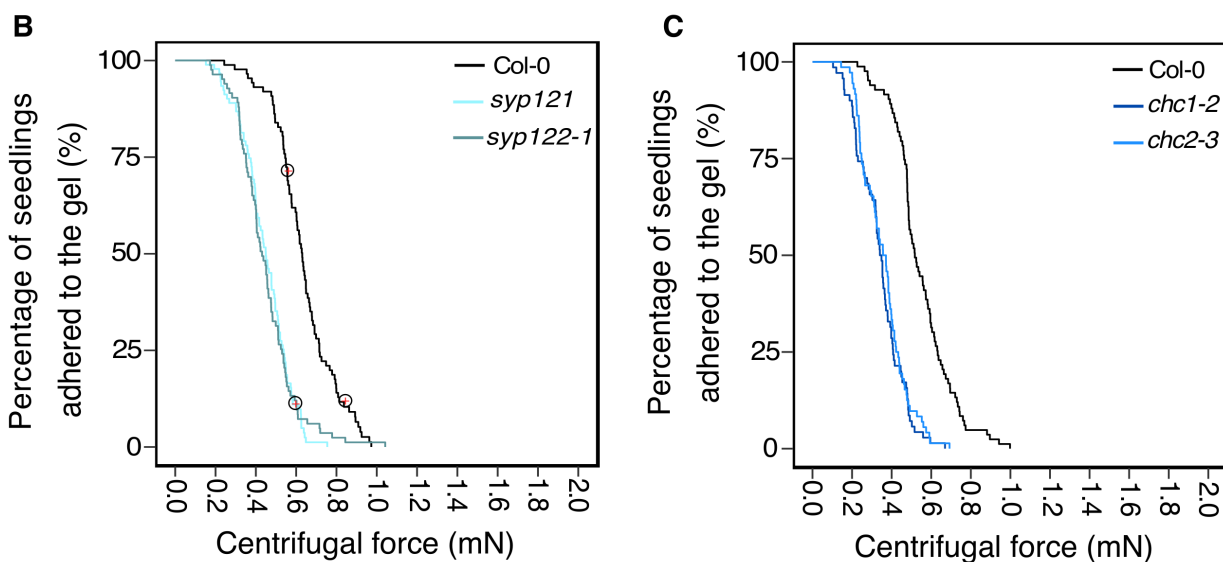

### Figure 3. Vesicle trafficking mechanisms that contribute to root-substrate adhesion

(A) Root hair phenotypes of 5-d-old wild-type (*Col-0*), *syp121*, *syp122-1*, *chc1-2* and *chc2-3* seedlings grown on a gel medium and statistical comparisons of mean root hair density (number per mm length of root) and mean root hair length (mm) for each mutant line relative to wild type. Scale bar = 0.5 mm. In the table, the mean ± standard error is given for the root hair density and root hair length of wild type and each mutant as well as a mean comparison to wild type, which is listed in bold. “No difference” is stated when there was no statistically significant difference between wild type and a mutant line. The statistical output of each univariate linear model is given.

Survival curves displaying the proportion of seedlings that adhered to the gel at increasing centrifugal force for (B) 87 wild type (*Col-0* – black); 91 *syp121* (turquoise); 83 *syp122-1* (blue/grey); and (C) 83 wild type (*Col-0* - black); 70 *chc1-2* (dark blue); and 72 *chc2-3* (medium blue). Red crosses circled on the survival curves represent seedlings that remained adhered to the gel after the maximum centrifugal speed (1611 RPM). The results shown are from a representative experiment for at least two independent experiments showing a statistically significant difference in adhesion between all mutant lines relative to wild type (Cox PH regression; alpha = 0.001). A single experiment included ≥ 70 biological replicates for each candidate line.

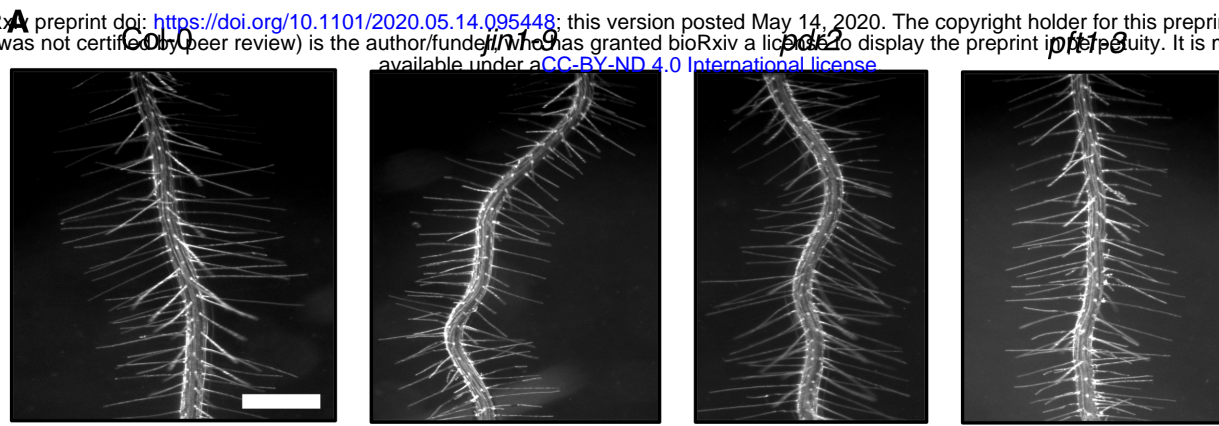

| Line          | Root hair density<br>(number per mm length of root) |                                          | Root hair length<br>(mm)              |                                         |
|---------------|-----------------------------------------------------|------------------------------------------|---------------------------------------|-----------------------------------------|
|               | Mean ± SE                                           | Comparison to Col-0                      | Mean ± SE                             | Comparison to Col-0                     |
| Col-0         | 30.111 ± 1.612                                      | -                                        | 0.416 ± 0.005                         | -                                       |
| <i>jin1-9</i> | 29.444 ± 1.271<br><b>No difference</b>              | t = -0.324, P > 0.05<br>d.f. = 16, n = 9 | 0.429 ± 0.006<br><b>No difference</b> | t = 0.555, P > 0.05<br>d.f. = 16, n = 9 |
| <i>pdr2</i>   | 31.125 ± 0.854<br><b>No difference</b>              | t = 0.533, P > 0.05<br>d.f. = 15, n = 8  | 0.428 ± 0.006<br><b>No difference</b> | t = 0.521, P > 0.05<br>d.f. = 15, n = 8 |
| <i>pft1-3</i> | 29.000 ± 1.179<br><b>No difference</b>              | t = -0.555, P > 0.05<br>d.f. = 16, n = 9 | 0.424 ± 0.006<br><b>No difference</b> | t = 0.295, P > 0.05<br>d.f. = 16, n = 9 |

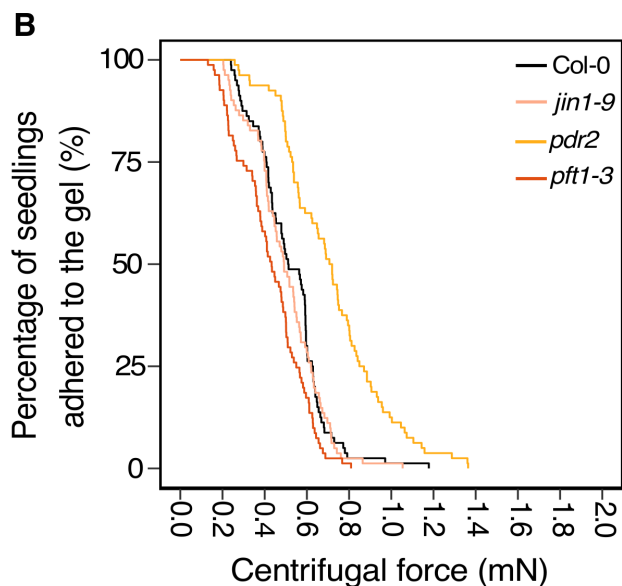

#### Figure 4. Exudate composition changes root-substrate adhesion properties

(A) Root hair phenotypes of 5-d-old wild-type (Col-0), *jin1-9*, *pdr2* and *pft1-3* seedlings grown on a gel medium and statistical comparisons of mean root hair density (number per mm length of root) and mean root hair length (mm) for each mutant line relative to wild type. Scale bar = 0.5 mm. In the table, the mean ± standard error is given for the root hair density and root hair length of wild type and each mutant as well as a mean comparison to wild type, which is listed in bold. “No difference” is stated when there was no statistically significant difference between wild type and a mutant line. The statistical output of each univariate linear model is given.

(B) Survival curves displaying the proportion of seedlings that adhered to the gel at increasing centrifugal force for 80 wild type (Col-0 – black), 81 *jin1-9* (light pink), 80 *pdr2* (light orange), and 81 *pft1-3* (dark orange). The results shown are from a representative experiment for at least two independent experiments showing a statistically significant difference in adhesion between mutant lines relative to wild type (Cox PH regression; alpha = 0.001), except for *jin1-9*. A single experiment included ≥ 70 biological replicates for each candidate line.

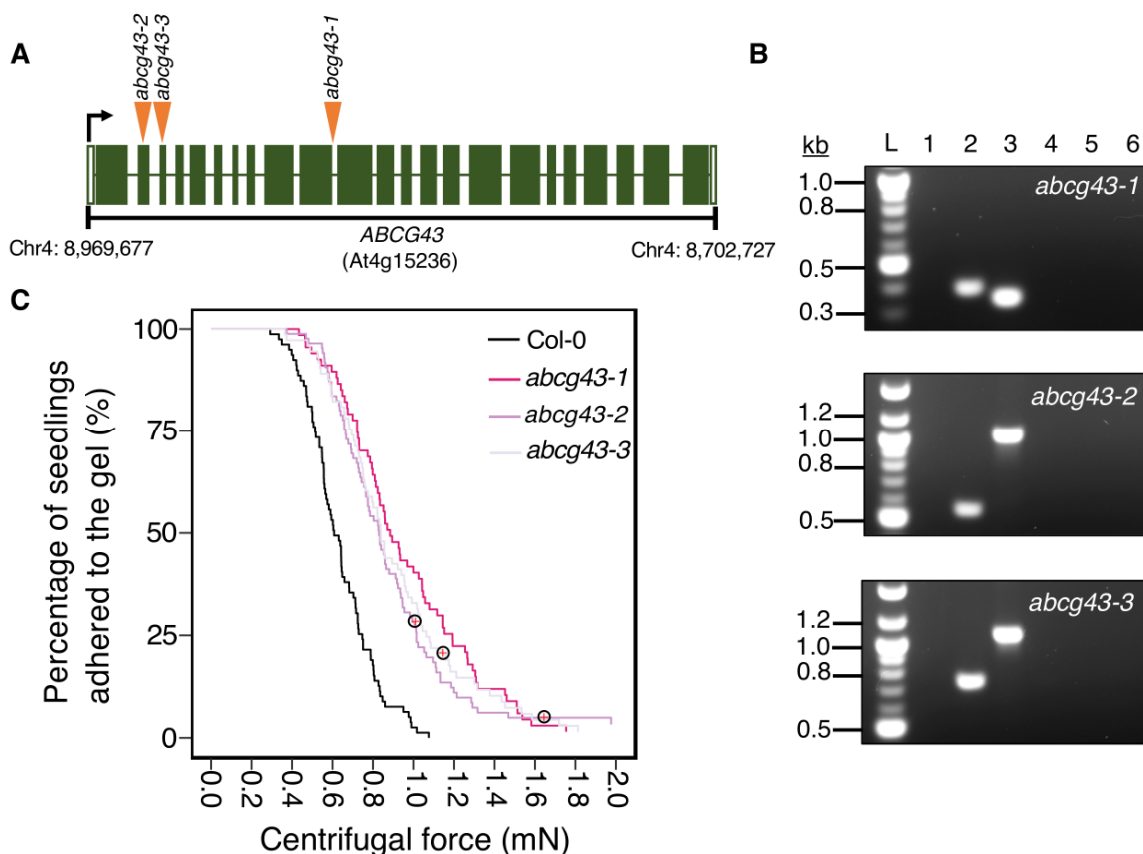

### Figure 5. Using the centrifuge assay in a forward genetic screen to identify root-substrate adhesion mutants

(A) T-DNA insert locations in *ABCG43* for each *abcg43* mutant allele, with insertions indicated by orange arrowheads. The *ABCG43* gene is located on chromosome four at position Chr4: 8,969,677-8,702,727 and contains 23 exons (dark green) and 22 introns (white gaps). *abcg43-1* has a T-DNA insert in the exon10/intron10 boundary, *abcg43-2* (SALK\_201207) has a T-DNA insert in exon 2 and *abcg43-3* (SALKseq\_30713) has a T-DNA insert in exon 3.

(B) Genomic PCR confirming the homozygosity of each *abcg43* mutant for the respective T-DNA inserts. Lanes 1 and 2 were loaded with the gene-specific and T-DNA-border PCR products from *abcg43* mutant lines. Lanes 3 and 4 were loaded with the gene-specific and T-DNA-border PCR products from a wild type (Col-0) genomic DNA template. Lanes 5 and 6 were loaded with the water controls for the gene-specific and T-DNA-border PCR reactions, respectively. 'L' indicates the 100-bp ladder. The expected product sizes for the gene-specific PCRs were ~350 nt, ~1025 nt and ~1090 nt; the T-DNA-border PCR product sizes were ~400 nt, ~550 nt and ~750 nt for *abcg43-1*, *abcg43-2* and *abcg43-3* alleles, respectively.

(C) Survival curves displaying the proportion of seedlings that adhered to the gel at increasing centrifugal force for 79 wild type (Col-0 – black), 70 *abcg43-1* (dark pink), 85 *abcg43-2* (purple), and 73 *abcg43-3* (light purple). Red crosses circled on the survival curves represent seedlings that remained adhered to the gel after the maximum centrifugal speed (1611 RPM). The results are from a representative experiment for at least two independent experiments showing a statistically significant difference in adhesion between the mutant lines relative to wild type (Cox PH regression; alpha = 0.001). A single experiment included  $\geq 70$  biological replicates for each candidate line.
